# Supplementary material for: DeepNitro: Prediction of Protein Nitration and Nitrosylation Sites by Deep Learning
Source: PubMed Central journal article supplement (PMC6205083; doi:10.1016/j.gpb.2018.04.007), 2018-09-27

# A Tyrosine nitration

PSSM score

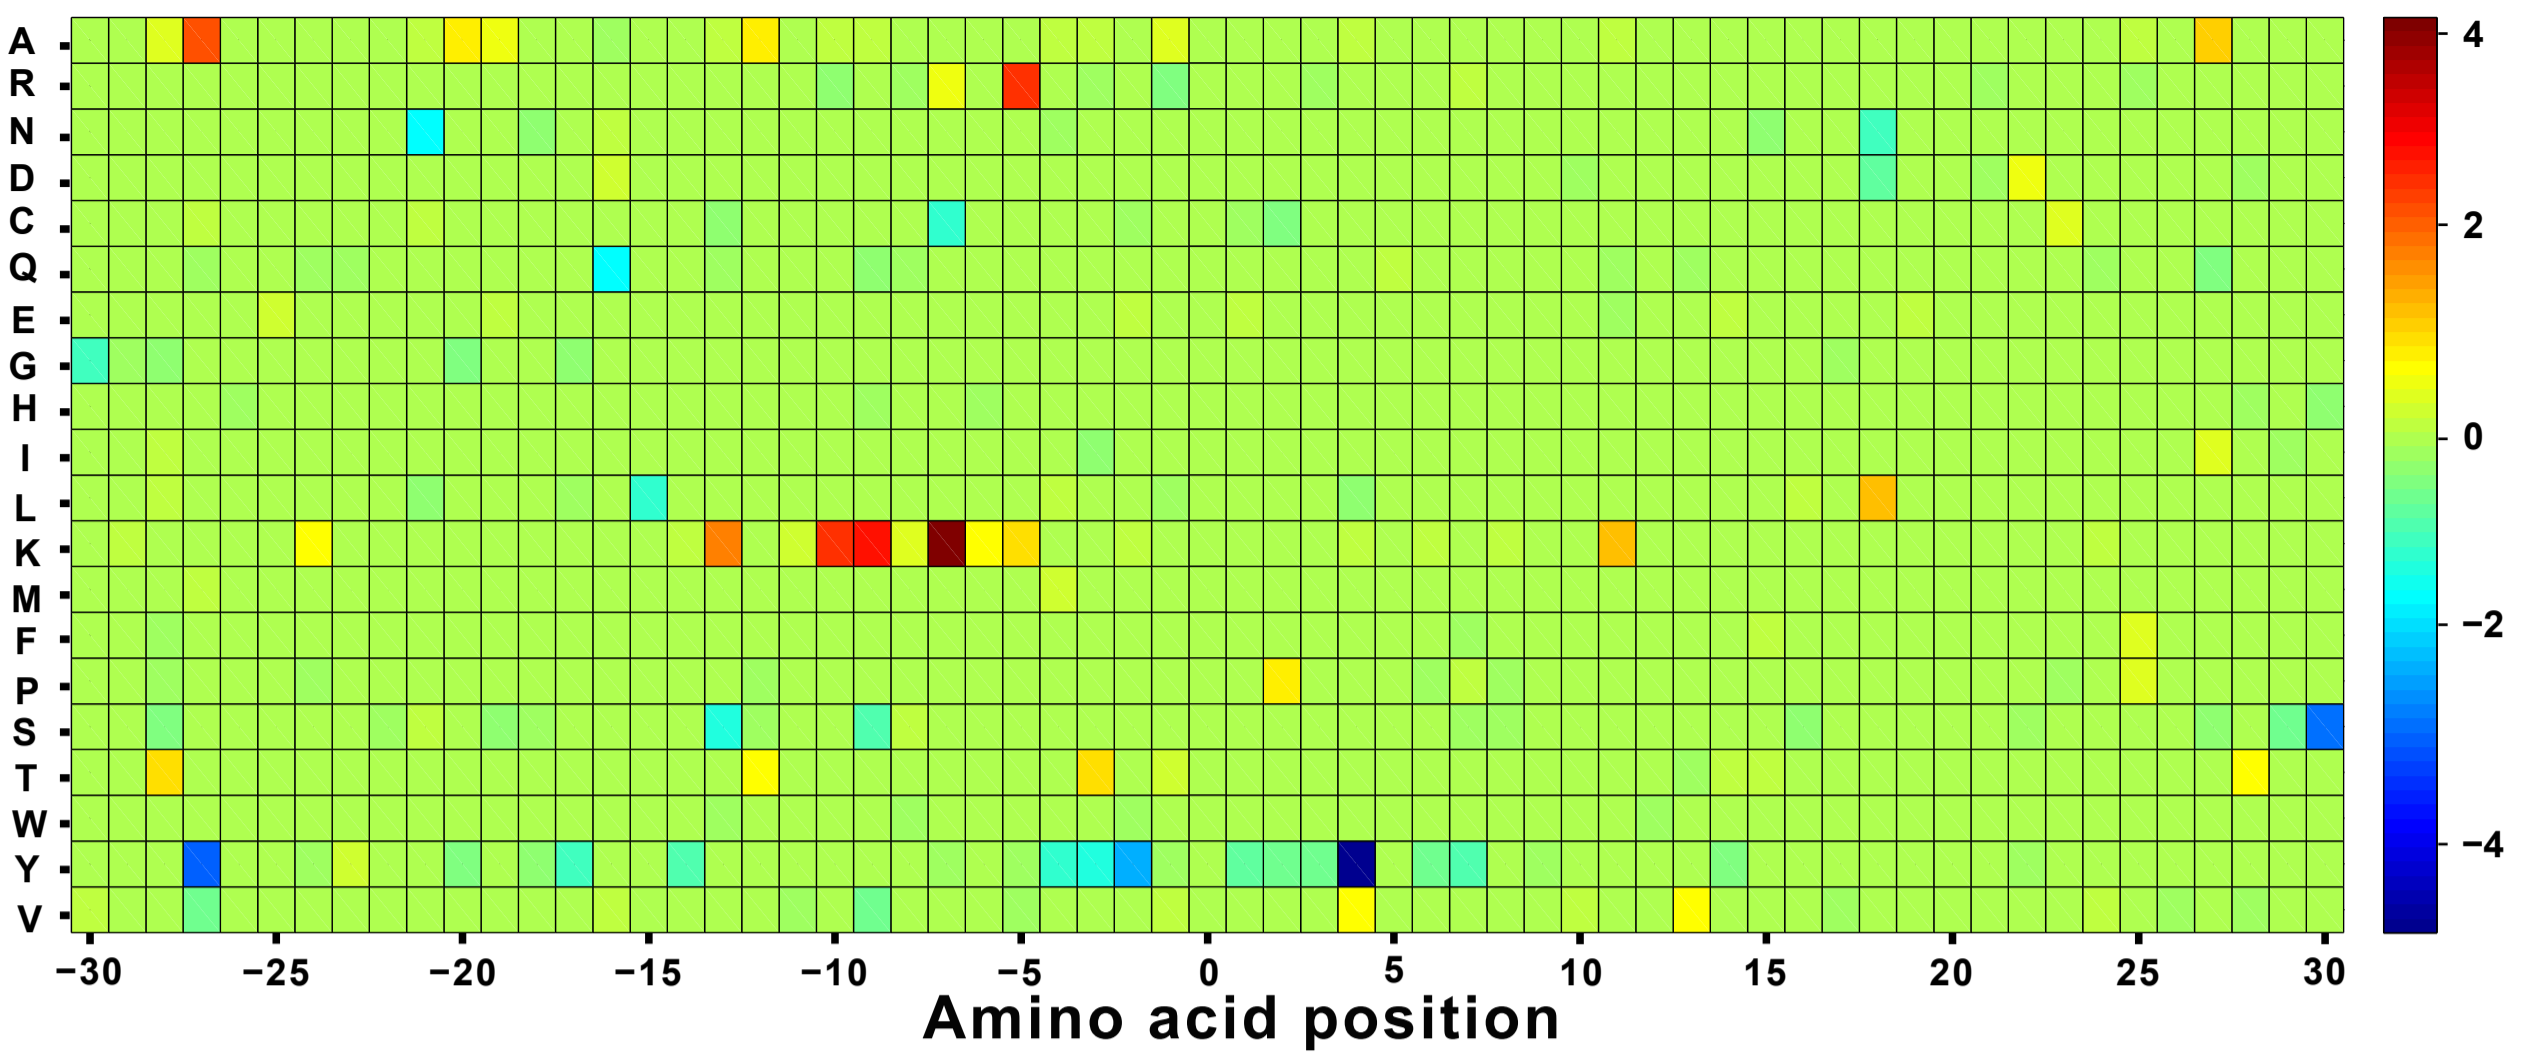

# B Tryptophan nitration

PSSM score

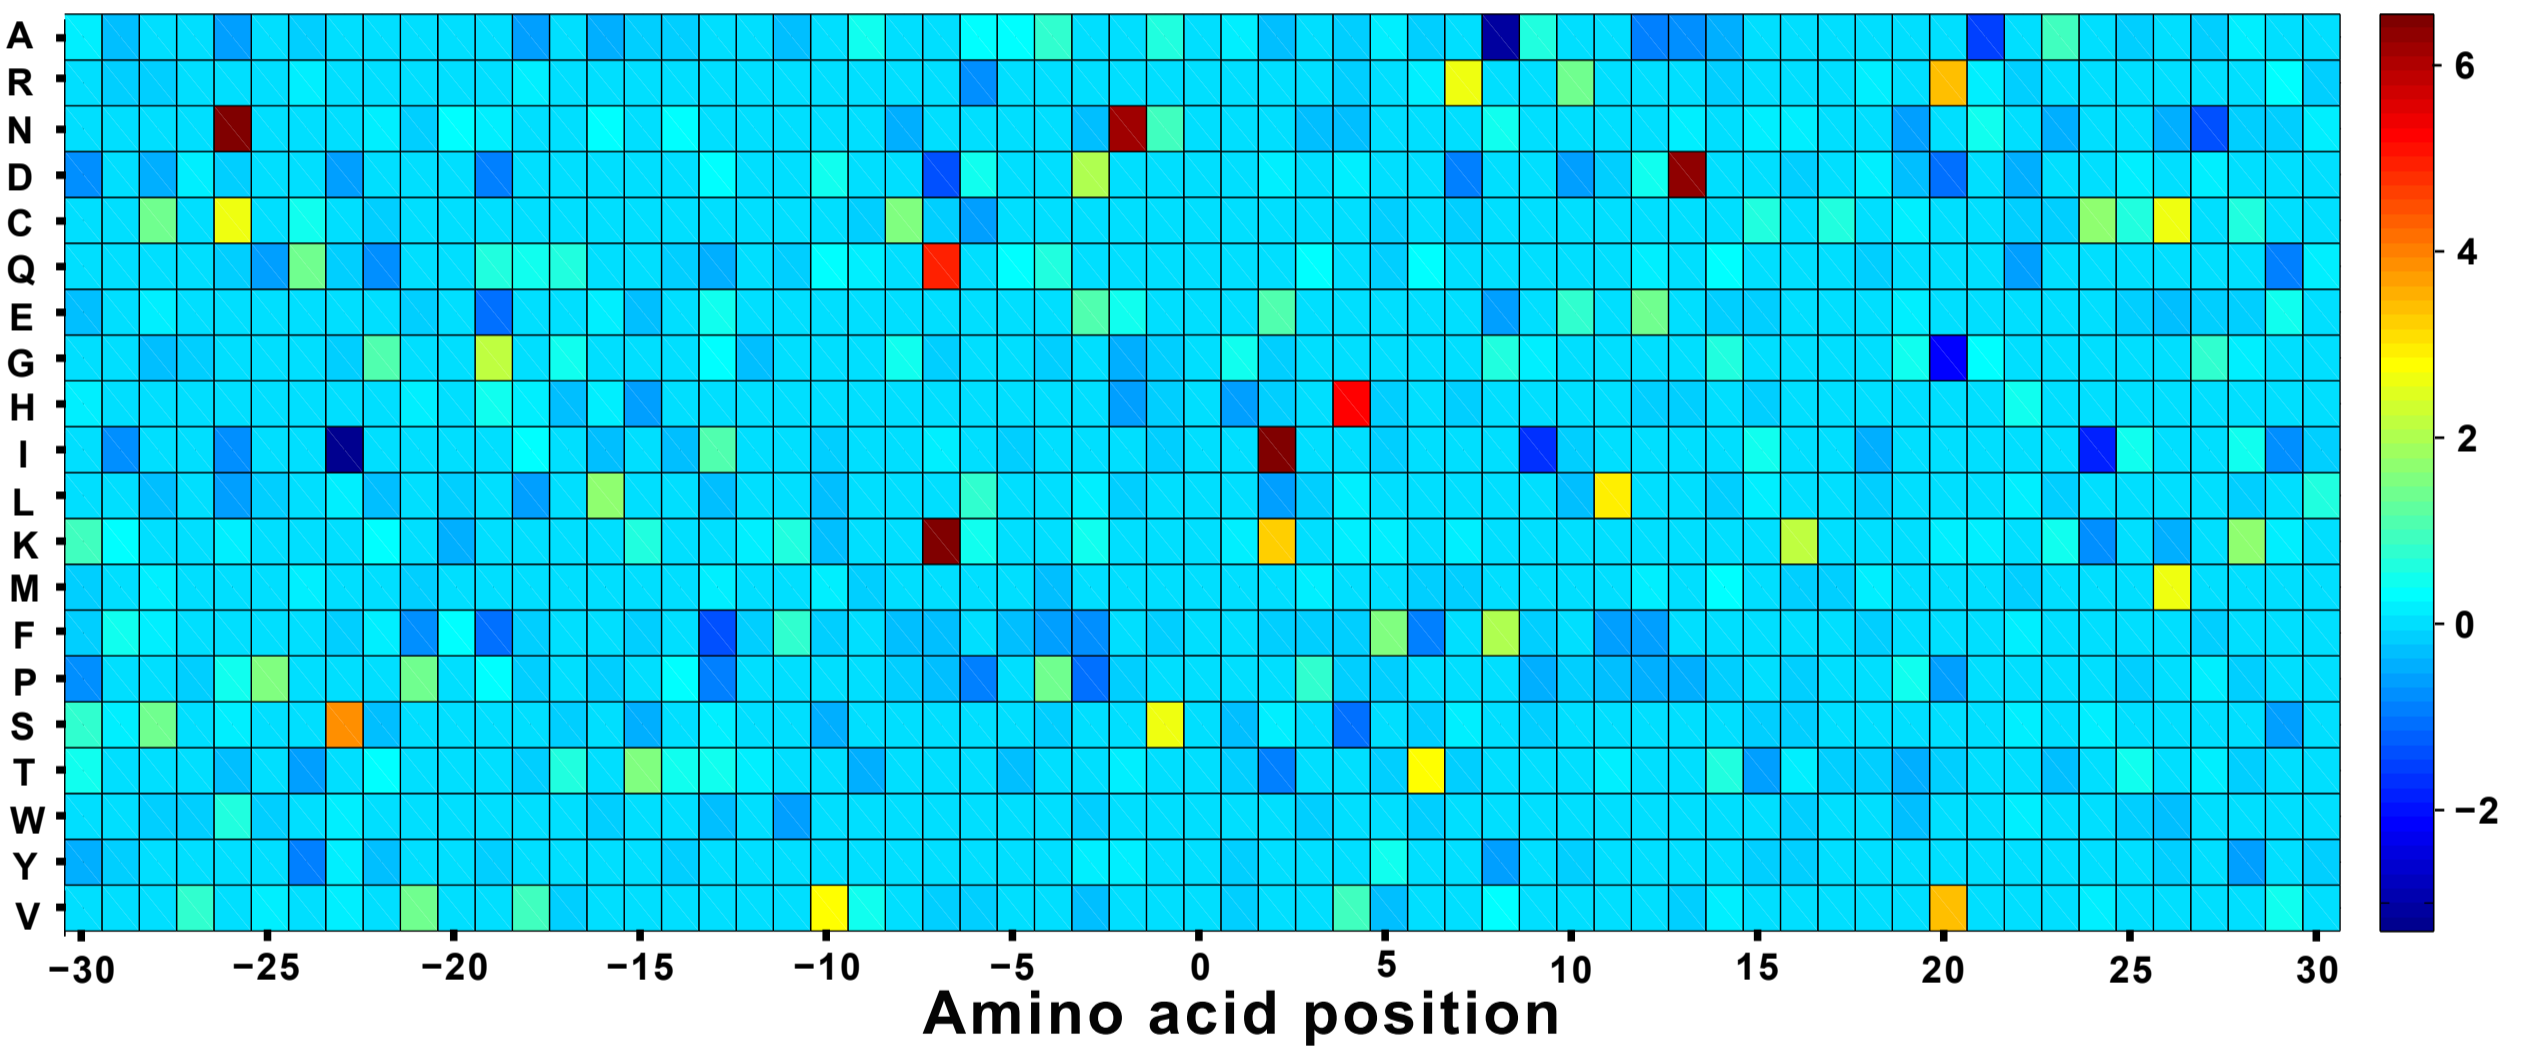

# C Cysteine nitrosylation

PSSM score

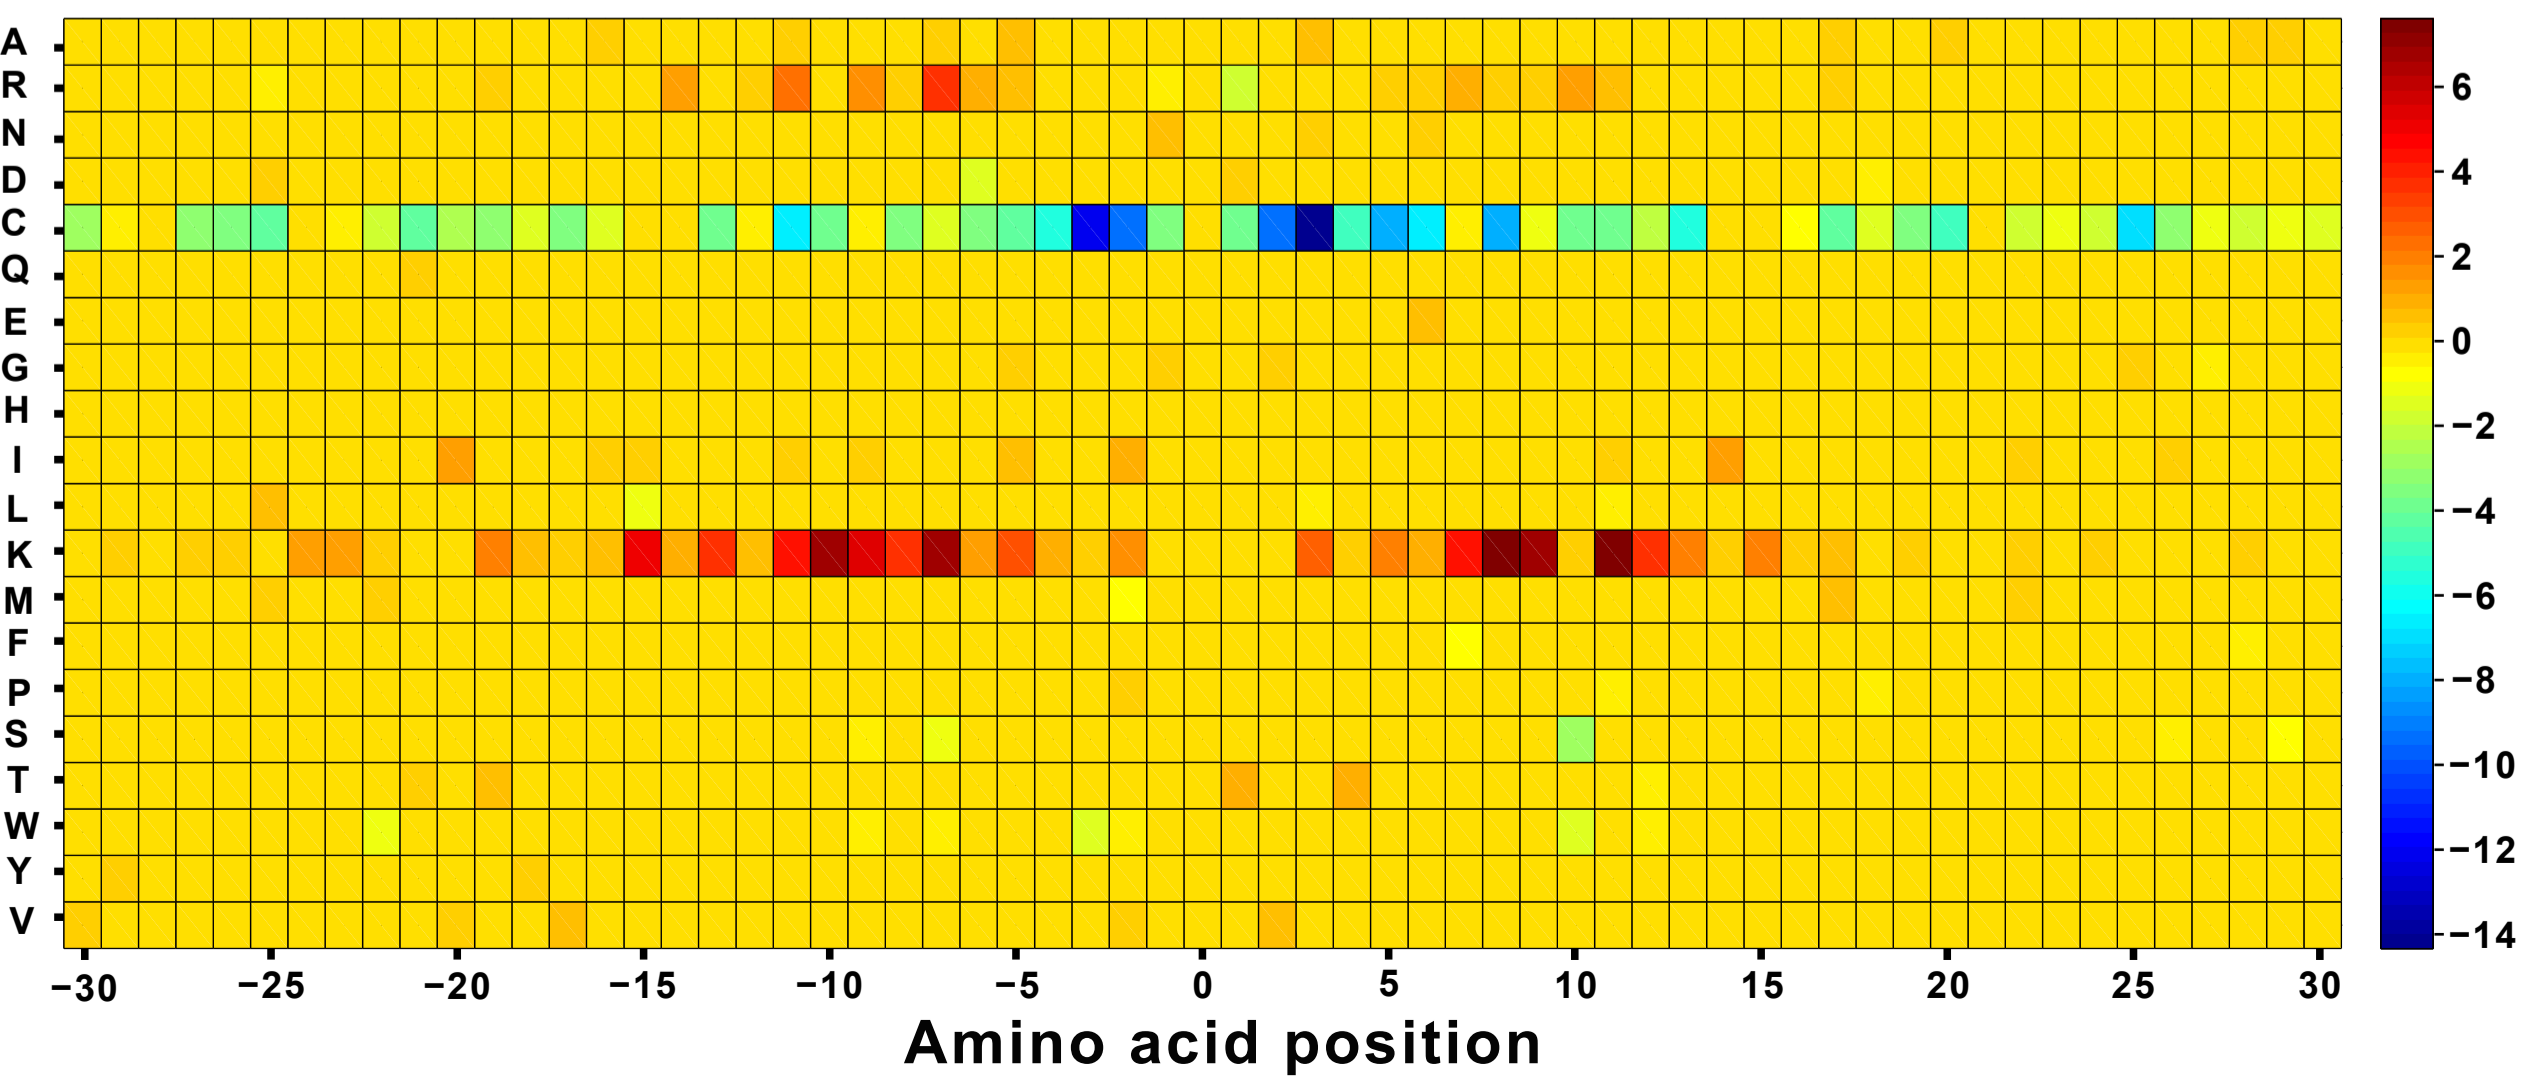

Supplement: mmc2.pdf [file mmc2.pdf]
