# Supplementary material for: DeepNitro: Prediction of Protein Nitration and Nitrosylation Sites by Deep Learning
Source: PubMed Central journal article supplement (PMC6205083; doi:10.1016/j.gpb.2018.04.007), 2018-09-27

**A Tyrosine nitration**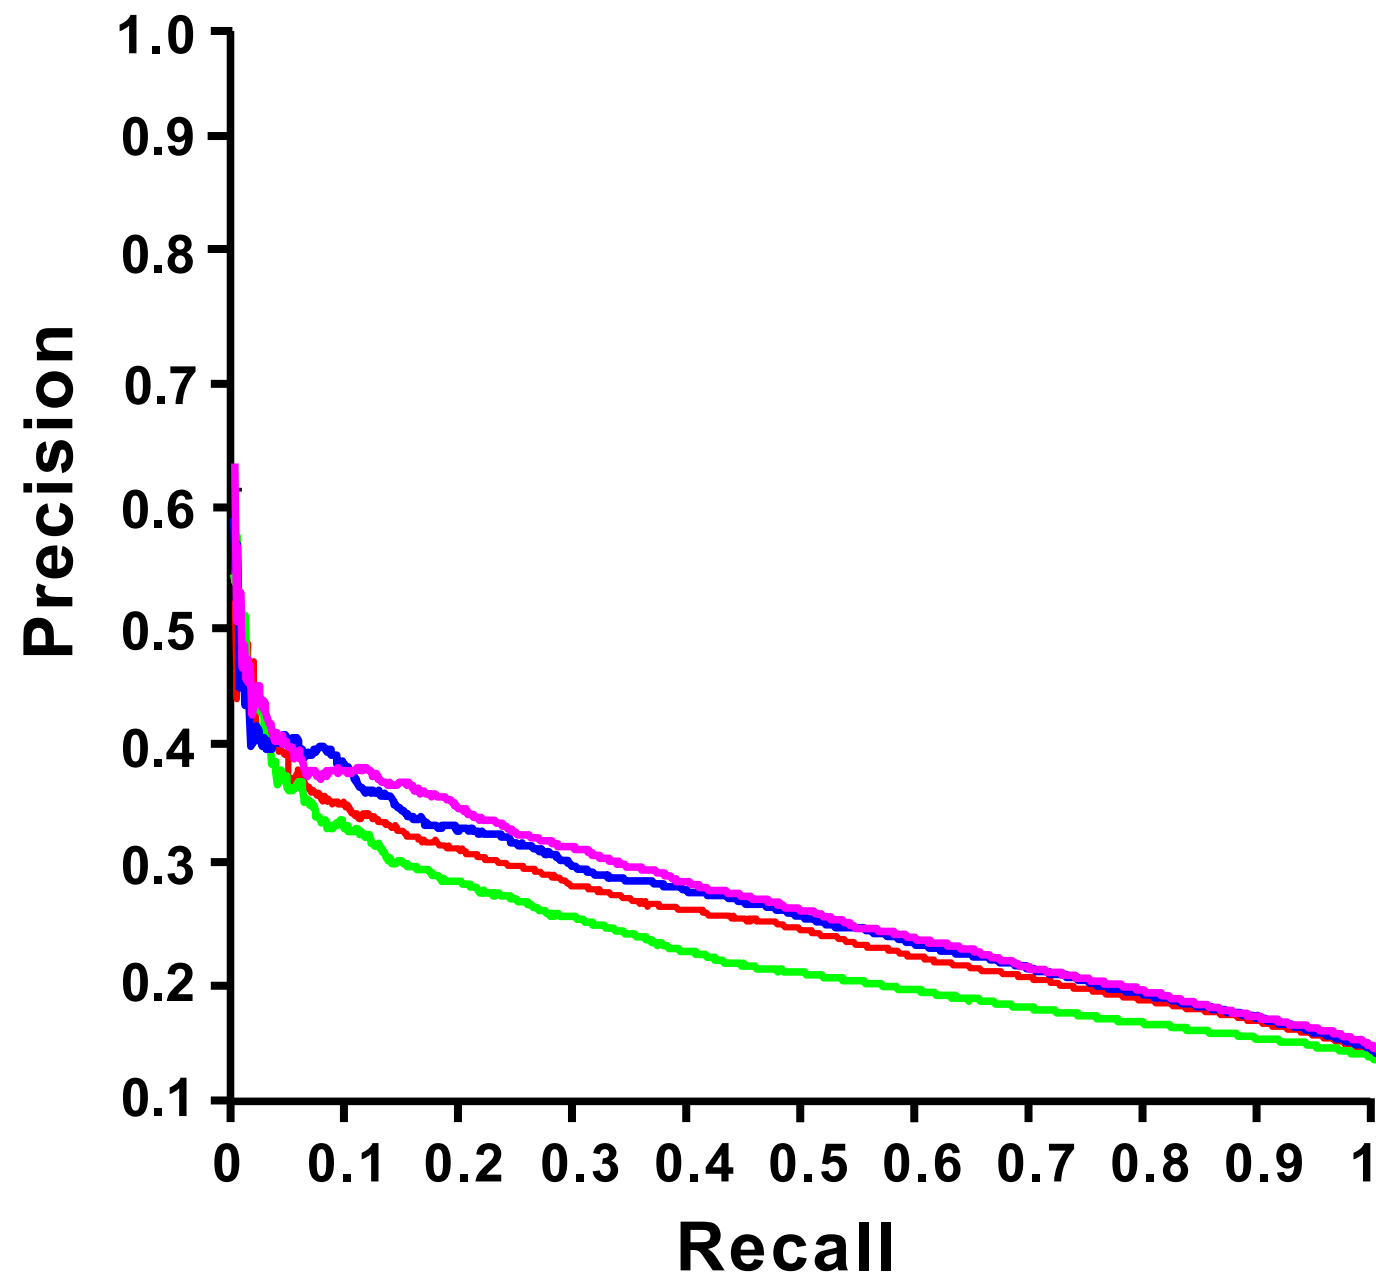**B Tryptophan nitration**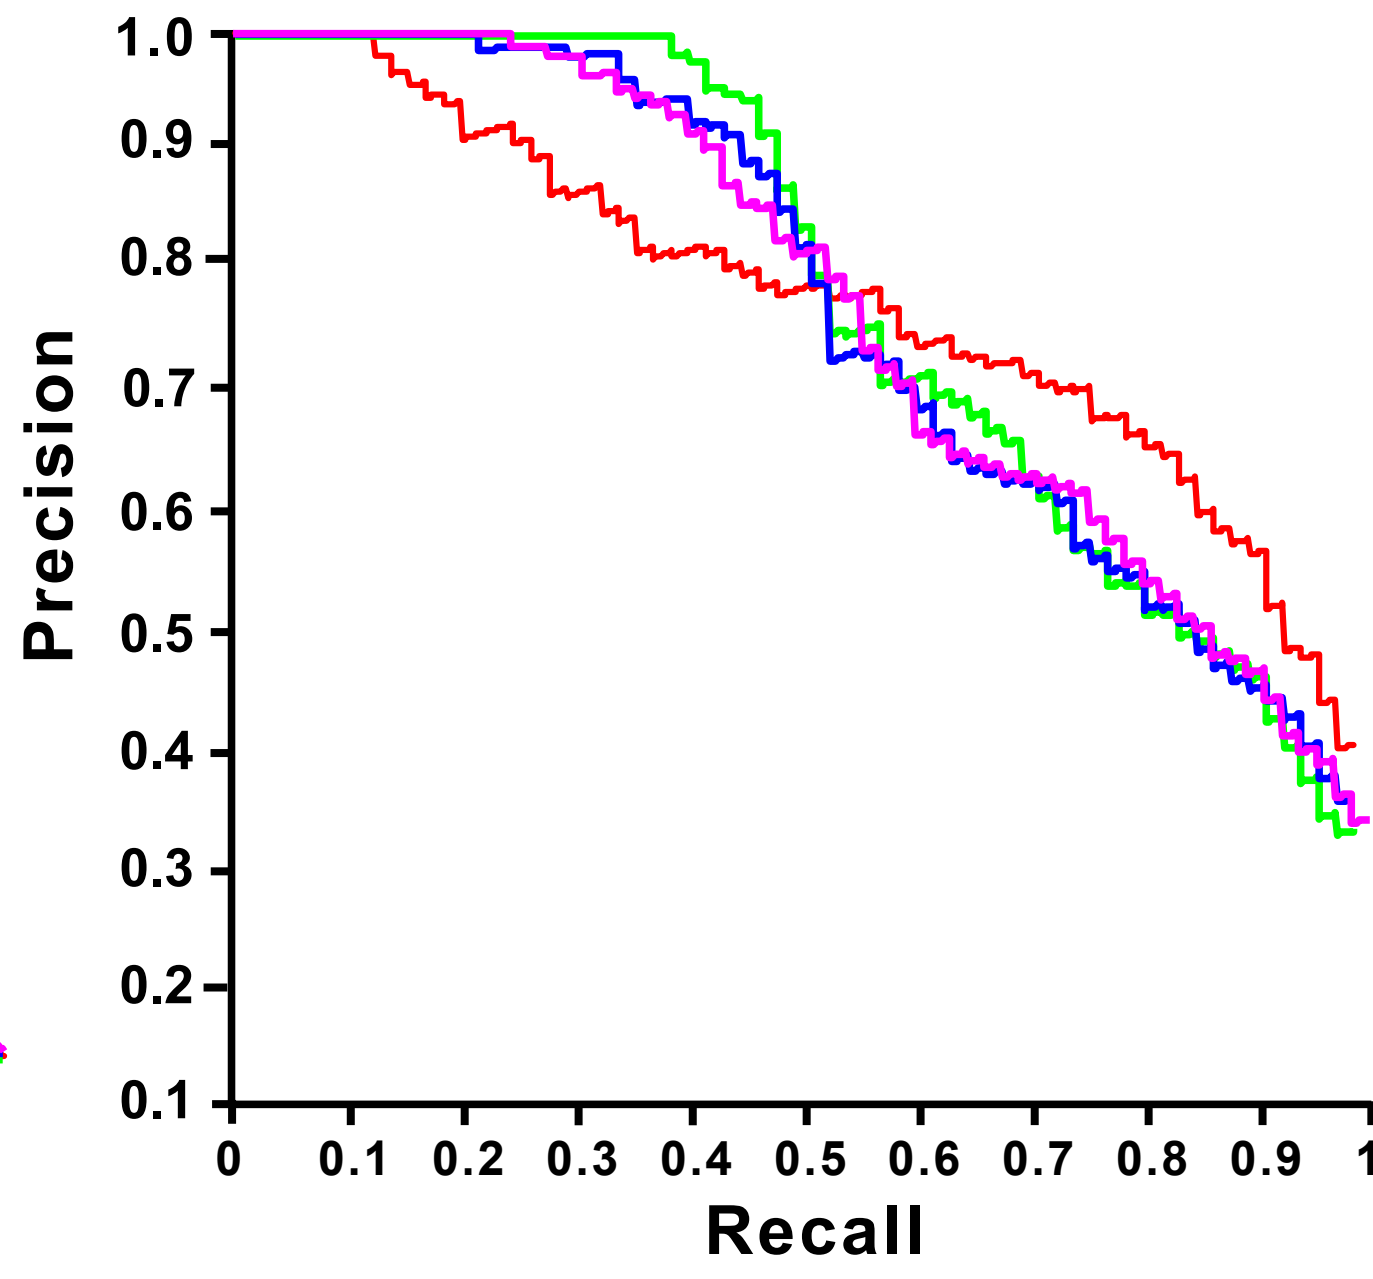**C Cysteine nitrosylation**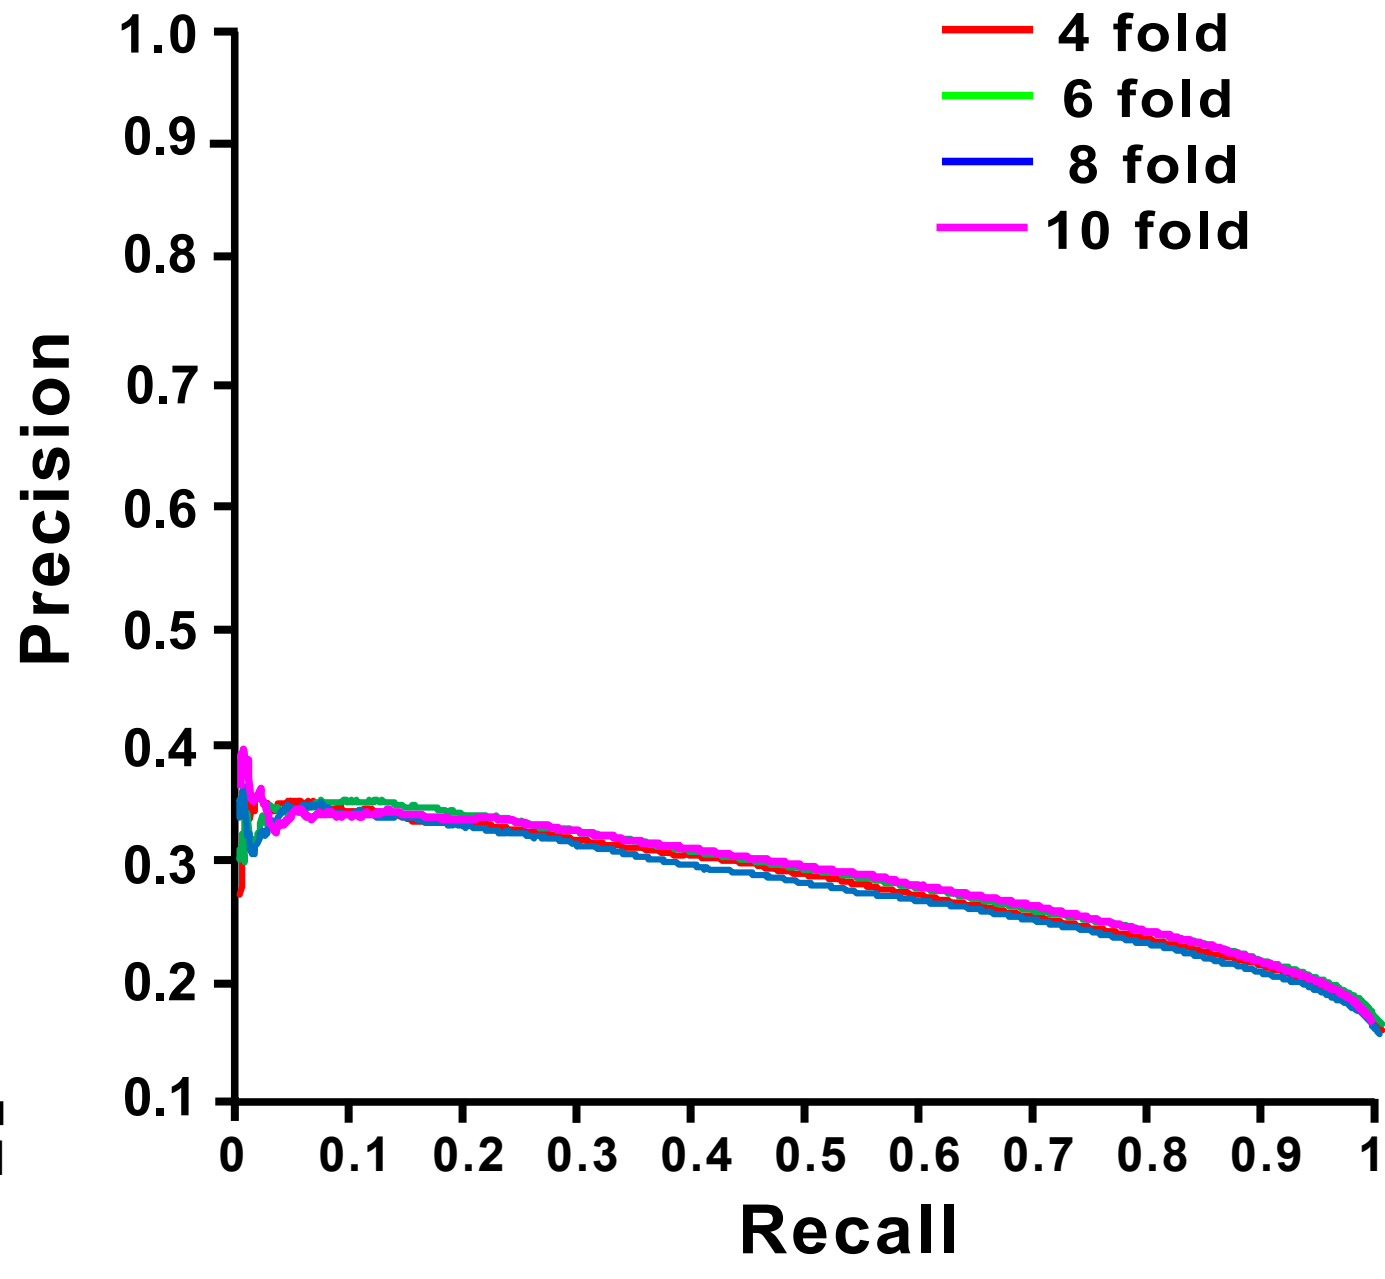

Supplement: mmc4.pdf [file mmc4.pdf]
